# Supplementary material for: Characterization of the first cultured representative of Verrucomicrobia subdivision 5 indicates the proposal of a novel phylum
Source: PubMed Central journal article supplement — ISME J. 2016 Jun 14;10(12):2801–16. doi: 10.1038/ismej.2016.84 (PMC5148204; doi:10.1038/ismej.2016.84), 2016-06-14
Supplement: ismej201684x3.pdf [file ismej201684x3.pdf]

**Supplementary Table S2.** List of manually annotated genes used to deduce distinct phenotypic or molecular traits of *K. glycovorans* L21-Fru-AB<sup>T</sup>. Genes arranged in tentative operons are shaded in the same colour.

| <i>Locus tag</i>        | <i>Gene</i>   | <i>Predicted product</i>                               | <i>Reference used for annotation</i> |                                                 |                 |                |
|-------------------------|---------------|--------------------------------------------------------|--------------------------------------|-------------------------------------------------|-----------------|----------------|
|                         |               |                                                        | <i>Protein ID</i>                    | <i>Organism</i>                                 | <i>Identity</i> | <i>E-value</i> |
| <b>Genome integrity</b> |               |                                                        |                                      |                                                 |                 |                |
| L21SP4_00661            | <i>hsdM</i>   | Type I restriction enzyme M protein                    | WP_035413363                         | <i>Chromohalobacter israelensis</i>             | 88%             | 0.0            |
| L21SP4_00662            | <i>hsdS</i>   | Type I restriction enzyme S protein                    | B2IJC7                               | <i>Beijerinckia indica</i> subsp. <i>indica</i> | 49%             | 9e-116         |
| L21SP4_00664            | <i>hsdR_1</i> | Type I restriction enzyme R protein                    | WP_024329383                         | <i>Thioalkalivibrio</i> sp. ALR17-21            | 89%             | 0.0            |
| L21SP4_01534            | <i>hsdR_2</i> | Type I restriction enzyme R protein                    | ESR26267                             | <i>Lutibaculum baratangense</i>                 | 74%             | 0.0            |
| L21SP4_01535            | <i>hsdM/S</i> | Type I restriction enzyme M protein                    | WP_008869845                         | <i>Desulfonatrosospira thiodismutans</i>        | 86%             | 0.0            |
|                         |               | Type I restriction enzyme S protein                    | GAO31177                             | <i>Geofilum rubicundum</i>                      | 52%             | 1e-47          |
| L21SP4_00684            | <i>res</i>    | Type III restriction enzyme res subunit                | WP_009340046                         | <i>Afipia</i> sp. 1NLS2                         | 80%             | 0.0            |
| L21SP4_00685            | <i>mod</i>    | Type III restriction enzyme mod subunit                | K9YUM0                               | <i>Dactylococcopsis salina</i>                  | 67%             | 0.0            |
| L21SP4_00679            | <i>mcrC</i>   | 5-methylcytosine-specific restriction enzyme subunit C | KJF16159                             | <i>Acidithrix ferrooxidans</i>                  | 71%             | 0.0            |
| L21SP4_00680            | <i>mcrB</i>   | 5-methylcytosine-specific restriction enzyme subunit B | EXI82560                             | “ <i>Candidatus</i> Accumulibacter sp. BA-92”   | 62%             | 0.0            |
| L21SP4_02005            | <i>cas1_1</i> | subtype II CRISPR-associated endonuclease Cas1         | WP_035473641                         | <i>Alistipes</i> sp. 627                        | 47%             | 3e-81          |
| L21SP4_02074            | <i>cas1_2</i> | subtype I-E CRISPR-associated endonuclease Cas1        | WP_004074392                         | <i>Desulfobacter postgatei</i>                  | 65%             | 1e-137         |

## Cell biology

|              |                |                                                                             |              |                                        |     |          |
|--------------|----------------|-----------------------------------------------------------------------------|--------------|----------------------------------------|-----|----------|
| L21SP4_02172 | <i>lpxB</i>    | Lipid-A-disaccharide synthase                                               | A0A0D6QG30   | <i>Anaeromyxobacter</i> sp. PSR-1      | 41% | 3.2e-82  |
| L21SP4_01206 | <i>rfaF</i>    | Lipopolysaccharide heptosyltransferase                                      | W6EGC3       | <i>Sulfurospirillum multivorans</i>    | 46% | 2.7e-84  |
| L21SP4_01194 | <i>lpxL</i>    | Lipid A biosynthesis lauroyl acyltransferase                                | W6EGB8       | <i>Sulfurospirillum multivorans</i>    | 36% | 4.4e-45  |
| L21SP4_00626 | <i>wza</i>     | Lipopolysaccharide export protein                                           | B4SFP0       | <i>Pelodictyon phaeoclathratiforme</i> | 34% | 9.8e-55  |
| L21SP4_00627 | <i>wzz/wzc</i> | Polysaccharide chain length determinant protein and protein tyrosine kinase | WP_028103229 | <i>Pseudoduganella violaceinigra</i>   | 25% | 4e-35    |
| L21SP4_00629 | <i>wcy</i>     | O-glycosylation polymerase                                                  | EFU70009     | <i>Arcobacter butzleri</i>             | 27% | 0.033    |
| L21SP4_00630 | <i>wbbJ_1</i>  | O-acetyltransferase                                                         | D6TLV5       | <i>Ktedonobacter racemifer</i>         | 45% | 2e-45    |
| L21SP4_00631 | <i>rfaB_1</i>  | Glycosyl transferase family 1                                               | WP_014067214 | <i>Rhodothermus marinus</i>            | 34% | 4e-32    |
| L21SP4_00632 | <i>rfaB_2</i>  | Glycosyl transferase family 1                                               | WP_008478365 | <i>Nitrolancea hollandica</i>          | 41% | 7e-86    |
| L21SP4_00633 | <i>wbbJ_2</i>  | O-acetyltransferase                                                         | KEQ23991     | <i>Paenibacillus</i> sp. MSt1          | 35% | 2e-15    |
| L21SP4_00634 | <i>wbbJ_3</i>  | O-acetyltransferase                                                         | WP_052036564 | <i>Tumebacillus flagellatus</i>        | 37% | 9e-21    |
| L21SP4_00635 | <i>rfaB_3</i>  | Glycosyl transferase family 1                                               | WP_012037009 | <i>Methanocella arvoryzae</i>          | 39% | 4e-83    |
| L21SP4_00636 | <i>eps?</i>    | Glycosyl transferase                                                        | WP_031458085 | <i>Chloroflexus</i> sp. MS-G           | 38% | 2e-59    |
| L21SP4_00637 | <i>wbbJ_4</i>  | O-acetyltransferase                                                         | AKU98109     | <i>Labilithrix luteola</i>             | 46% | 2e-34    |
| L21SP4_00638 | <i>eps?</i>    | Glycosyl transferase family 2                                               | WP_014400810 | <i>Corallocooccus coralloides</i>      | 45% | 8e-73    |
| L21SP4_00463 | <i>ddl</i>     | D-alanine--D-alanine ligase                                                 | A0A0C2HLI0   | <i>Geoalkalibacter ferrihydriticus</i> | 46% | 8.9e-73  |
| L21SP4_01761 | <i>murF</i>    | UDP-N-acetylmuramoyl-tripeptide--D-alanyl-D-alanine ligase                  | B4UER7       | <i>Anaeromyxobacter</i> sp. (strain K) | 38% | 2.2e-80  |
| L21SP4_01757 | <i>ftsW</i>    | Peptidoglycan lipid II flippase                                             | B3E3Y3       | <i>Geobacter lovleyi</i>               | 41% | 7.9e-83  |
| L21SP4_00466 | <i>ftsZ</i>    | Cell division protein FtsZ                                                  | B9XIG1       | <i>Pedosphaera parvula</i>             | 29% | 410E-51  |
| L21SP4_00999 | <i>mreB</i>    | Cell shape determining protein                                              | B9XG13       | <i>Pedosphaera parvula</i>             | 74% | 2.6E-177 |
| L21SP4_01870 | <i>tolB</i>    | Translocation protein TolB                                                  | WP_013249867 | <i>Nitrospira defluvii</i>             | 38% | 3e-57    |

|              |               |                                         |              |                                               |     |          |
|--------------|---------------|-----------------------------------------|--------------|-----------------------------------------------|-----|----------|
| L21SP4_01871 | <i>pal</i>    | Peptidoglycan-associated lipoprotein    | C7LX40       | <i>Desulfomicrobium baculatum</i>             | 42% | 1e-32    |
| L21SP4_01813 | <i>ppk</i>    | Polyphosphate kinase                    | WP_012912472 | <i>Pirellula staleyi</i>                      | 54% | 0.0      |
| L21SP4_01814 | <i>ppx</i>    | Exopolyphosphatase                      | WP_012912473 | <i>Pirellula staleyi</i>                      | 50% | 6e-162   |
| L21SP4_01507 | <i>glgC</i>   | Glucose-1-phosphate adenylyltransferase | A0A0F2NDJ6   | <i>Desulfobulbaceae</i> bacterium<br>BRH_c16a | 61% | 2.6e-168 |
| L21SP4_00491 | <i>glgX</i>   | Glycogen-debranching enzyme             | WP_011418612 | <i>Syntrophus aciditrophicus</i>              | 49% | 0.0      |
| L21SP4_00492 | <i>glgP_1</i> | Glucan phosphorylase                    | WP_021760846 | <i>Desulfovibrio gigas</i>                    | 48% | 0.0      |
| L21SP4_00493 | <i>glgA_1</i> | Glycogen/starch synthase                | S0G459       | <i>Desulfotignum phosphitoxidans</i>          | 58% | 0.0      |
| L21SP4_00494 | <i>glgB</i>   | 1,4-alpha-glucan branching enzyme       | WP_025324074 | <i>Deferrisoma camini</i>                     | 62  | 0.0      |
| L21SP4_01037 | <i>glgA_2</i> | Glycogen synthase                       | I4C115       | <i>Desulfomonile tiedjei</i>                  | 42% | 3.6e-117 |
| L21SP4_01270 | <i>glgP_2</i> | Glycogen phosphorylase                  | WP_013293291 | <i>Gallionella capsiferiformans</i>           | 52% | 0.0      |

### Nutrient uptake

|              |                  |                                                                     |              |                                         |     |        |
|--------------|------------------|---------------------------------------------------------------------|--------------|-----------------------------------------|-----|--------|
| L21SP4_01391 | <i>amt_1</i>     | Ammonium transporter                                                | H1XV27       | <i>Caldithrix abyssi</i>                | 69% | 0.0    |
| L21SP4_01503 | <i>amt_2</i>     | Ammonium transporter                                                | S0G181       | <i>Desulfotignum phosphitoxidans</i>    | 63% | 0.0    |
| L21SP4_00568 | <i>gdh</i>       | Glutamate dehydrogenase                                             | WP_028894236 | <i>Syntrophorhabdus aromaticivorans</i> | 72% | 0.0    |
| L21SP4_01522 | <i>gln</i>       | Glutamine synthetase                                                | D8EZN8       | Deltaproteobacterium NaphS2             | 80% | 0.0    |
| L21SP4_02316 | <i>cysN/cysC</i> | Bifunctional sulfate adenylyltransferase/<br>adenylylsulfate kinase | R4V6K8       | <i>Spiribacter salinus</i>              | 66% | 0.0    |
| L21SP4_02317 | <i>sulP</i>      | Sulfate permease                                                    | W9V4Z0       | <i>Thiorhodococcus</i> sp. AK35         | 58% | 0.0    |
| L21SP4_00290 | <i>pstS</i>      | Phosphate transporter, binding protein                              | CDE84321     | <i>Coralimargarita</i> sp. CAG:312      | 52% | 7e-101 |
| L21SP4_00291 | <i>pstC</i>      | Phosphate transporter, inner membrane<br>subunit C                  | WP_012508404 | <i>Pelodictyon phaeoclathratiforme</i>  | 58% | 4e-150 |
| L21SP4_00292 | <i>pstA</i>      | Phosphate transporter, inner membrane<br>subunit A                  | WP_012502165 | <i>Chlorobaculum parvum</i>             | 57% | 3e-179 |

|              |               |                                                                |              |                                              |     |          |
|--------------|---------------|----------------------------------------------------------------|--------------|----------------------------------------------|-----|----------|
| L21SP4_00293 | <i>pstB</i>   | Phosphate transporter, ATP-binding protein                     | WP_011890232 | <i>Chlorobium phaeovibrioides</i>            | 66% | 5e-132   |
| L21SP4_01162 | <i>nptA</i>   | Na <sup>+</sup> /phosphate symporter                           | WP_020614062 | <i>Spirochaeta bajacaliforniensis</i>        | 44% | 2e-165   |
| L21SP4_01108 | <i>fepA_1</i> | TonB dependent receptor plug                                   | A0A084D6N7   | <i>Burkholderia</i> sp. MSh2                 | 38% | 6.2e-7   |
| L21SP4_01109 | <i>fepA_2</i> | TonB dependent siderophore receptor                            | ABC76107     | <i>Syntrophus aciditrophicus</i> SB          | 33% | 6e-92    |
| L21SP4_01110 | <i>exbB</i>   | Biopolymer transporter, subunit B                              | KHE91107     | “ <i>Ca. Scalindua brodae</i> ”              | 49% | 9e-64    |
| L21SP4_01111 | <i>exbD</i>   | Biopolymer transporter, subunit D                              | KHE91106     | “ <i>Ca. Scalindua brodae</i> ”              | 46% | 1e-28    |
| L21SP4_01112 | <i>tonB</i>   | TonB energy transducer protein                                 | WP_045758093 | <i>Xanthomonas albilineans</i>               | 39% | 1e-16    |
| L21SP4_01113 | <i>fepB</i>   | Fe <sup>3+</sup> -siderophore transporter, binding protein     | K6QFK1       | <i>Thermaerobacter subterraneus</i>          | 34% | 6.1e-38  |
| L21SP4_01114 | <i>fepC</i>   | Fe <sup>3+</sup> -siderophore transporter, ATP-binding protein | K0JZB7       | <i>Saccharothrix espanaensis</i>             | 45% | 2.6e-57  |
| L21SP4_01115 | <i>fepD</i>   | Fe <sup>3+</sup> -siderophore transporter, permease            | I1XI55       | <i>Methylophaga nitratireducenticrescens</i> | 53% | 2.5e-108 |
| L21SP4_01608 | <i>feoB</i>   | Fe <sup>2+</sup> -transporter, subunit B                       | KJS31893     | <i>Desulfatitalea</i> sp. BRH_c12            | 58% | 0.0      |
| L21SP4_01609 | <i>feoA_1</i> | Fe <sup>2+</sup> -transporter, subunit A                       | WP_044249593 | <i>Rhodobacter sphaeroides</i>               | 53% | 2e-19    |
| L21SP4_01610 | <i>feoA_2</i> | Fe <sup>2+</sup> -transporter, subunit A                       | WP_046859083 | <i>Sedimenticola</i> sp. SIP-G1              | 40% | 1e-11    |
| L21SP4_00297 | <i>znuB</i>   | Zn <sup>2+</sup> -transporter, permease                        | WP_015404094 | <i>Desulfocapsa sulfexigens</i>              | 53% | 6e-80    |
| L21SP4_00298 | <i>znuC</i>   | Zn <sup>2+</sup> -transporter, ATP-binding protein             | WP_013257430 | <i>Desulfarculus baarsii</i>                 | 55% | 1e-83    |
| L21SP4_00299 | <i>znuA</i>   | Zn <sup>2+</sup> -transporter, binding protein                 | G2FI49       | Endosymbiont of <i>Tevnia jerichonana</i>    | 41% | 5.7e-58  |
| L21SP4_01892 | <i>cbiM</i>   | Cobalt transporter, permease                                   | WP_014553677 | <i>Halanaerobium praevalens</i>              | 47% | 1e-57    |
| L21SP4_01897 | <i>cbiQ</i>   | Cobalt transporter, permease                                   | F9UFE0       | <i>Thiocapsa marina</i>                      | 40% | 1.7e-39  |
| L21SP4_01898 | <i>cbiO</i>   | Cobalt transporter, ATP-binding protein                        | KJU86287     | “ <i>Ca. Magnetobacterium bavaricum</i> ”    | 50% | 1e-60    |
| L21SP4_00567 | <i>copA</i>   | Copper-translocating P-type ATPase                             | B9XQN6       | <i>Pedosphaera parvula</i>                   | 60% | 0.0      |

|              |                  |                                                           |              |                                         |     |          |
|--------------|------------------|-----------------------------------------------------------|--------------|-----------------------------------------|-----|----------|
| L21SP4_00133 | <i>xylE</i>      | MFS sugar transporter                                     | C6Y1K3       | <i>Pedobacter heparinus</i>             | 54% | 4.9e-165 |
| L21SP4_00407 | <i>melB</i>      | Na <sup>+</sup> /melibiose symporter                      | WP_052361845 | <i>Diplosphaera colitermitum</i>        | 41% | 5e-120   |
| L21SP4_00607 | <i>fucP</i>      | Fucose permease                                           | GAP69702     | <i>Bacteroidales</i> bacterium 6E       | 30% | 2e-17    |
| L21SP4_00931 | <i>rhaT</i>      | L-rhamnose-proton symporter                               | I0KBJ9       | <i>Fibrella aestuarina</i>              | 52% | 2.6e-125 |
| L21SP4_00327 | <i>ugpBA</i>     | Sugar transporter, binding protein and permease           | CCW34240     | <i>Chthonomonas calidirosea</i>         | 42% | 0.0      |
| L21SP4_00328 | <i>ugpE</i>      | Sugar transporter, permease                               | F4A328       | <i>Mahella australiensis</i>            | 31% | 1.9e-66  |
| L21SP4_01748 | <i>ugpC</i>      | Sugar transporter, ATP-binding protein                    | WP_006930568 | <i>Caldithrix abyssi</i>                | 62% | 5e-159   |
| L21SP4_00561 | <i>dppA</i>      | Oligopeptide transporter, binding protein                 | S0EYF5       | <i>Chthonomonas calidirosea</i>         | 37% | 6.4e-117 |
| L21SP4_00562 | <i>dppB</i>      | Oligopeptide transporter, permease                        | B0BYS9       | <i>Acaryochloris marina</i>             | 45% | 2.4e-72  |
| L21SP4_00563 | <i>dppC</i>      | Oligopeptide transporter, permease                        | WP_012472414 | “ <i>Ca. Amoebophilus asiaticus</i> ”   | 47% | 4e-95    |
| L21SP4_02164 | <i>dppF_1</i>    | Oligopeptide transporter, ATP-binding protein             | WP_009959466 | <i>Verrucomicrobium spinosum</i>        | 53% | 1e-86    |
| L21SP4_02165 | <i>dppF_2</i>    | Oligopeptide transporter, ATP-binding protein             | WP_024722335 | <i>Clostridiales</i> bacterium VE202-01 | 55% | 6e-92    |
| L21SP4_00756 | <i>potE</i>      | Amino acid permease                                       | WP_012571743 | <i>Thermococcus onnurineus</i>          | 43% | 0.0      |
| L21SP4_01661 | <i>potE/ptsN</i> | Amino acid permease/PTS IIA domain                        | WP_022947290 | <i>Methylohalobius crimeensis</i>       | 55% | 0.0      |
| L21SP4_02424 | <i>dctP</i>      | TRAP C4-dicarboxylate transporter, binding protein        | WP_008673150 | <i>Rhodopirellula sallentina</i>        | 67% | 2e-166   |
| L21SP4_02425 | <i>dctQ</i>      | TRAP C4-dicarboxylate transporter, small permease protein | EMI43071     | <i>Rhodopirellula</i> sp. SWK7          | 59% | 1e-58    |
| L21SP4_02426 | <i>dctM</i>      | TRAP C4-dicarboxylate transporter, large permease protein | WP_009100429 | <i>Rhodopirellula</i> sp. SWK7          | 73% | 0.0      |

## Secretion and resistance

|              |              |                                                      |              |                                           |     |          |
|--------------|--------------|------------------------------------------------------|--------------|-------------------------------------------|-----|----------|
| L21SP4_00102 | <i>ffh</i>   | Signal recognition particle protein                  | WP_013043353 | <i>Coralimargarita akajimensis</i>        | 50% | 2e-150   |
| L21SP4_01780 | <i>ftsY</i>  | Signal recognition particle receptor                 | WP_028388901 | <i>Legionella fairfieldensis</i>          | 45% | 4e-81    |
| L21SP4_00353 | <i>secA</i>  | Preprotein translocase, subunit A                    | WP_006981786 | <i>Chthoniobacter flavus</i>              | 53% | 0.0      |
| L21SP4_00551 | <i>gidC</i>  | Membrane protein insertase                           | WP_013044213 | <i>Coralimargarita akajimensis</i>        | 36% | 9e-90    |
| L21SP4_00560 | <i>secG</i>  | Preprotein translocase, subunit G                    | WP_032125434 | <i>Chlamydia</i> sp. 'Diamant'            | 44% | 1e-12    |
| L21SP4_00799 | <i>yajC</i>  | Preprotein translocase, YajC subunit                 | CDE83420     | <i>Coralimargarita</i> sp. CAG:312        | 42% | 1e-21    |
| L21SP4_00800 | <i>secDF</i> | Bifunctional preprotein translocase, subunit D and F | KJJ83209     | " <i>Ca. Omnitrophus</i> sp. SKK-01"      | 44% | 0.0      |
| L21SP4_01696 | <i>secY</i>  | Preprotein translocase, subunit Y                    | WP_006977832 | <i>Chthoniobacter flavus</i>              | 55% | 1e-167   |
| L21SP4_01727 | <i>secE</i>  | Preprotein translocase, subunit E                    | WP_002848632 | <i>Ruminococcus albus</i>                 | 46% | 4e-09    |
| L21SP4_01749 | <i>tatB</i>  | Twin-arginine translocation, subunit B               | B6ISL9       | <i>Rhodospirillum centenum</i>            | 27% | 1.2e-5   |
| L21SP4_01750 | <i>tatC</i>  | Twin-arginine translocation, subunit C               | WP_015851434 | <i>Desulfovibrio salexigens</i>           | 36% | 8e-47    |
| L21SP4_01751 | <i>tatA</i>  | Twin-arginine translocation, subunit A               | Q18HC5       | <i>Haloquadratum walsbyi</i>              | 47% | 2.8e-20  |
| L21SP4_00726 | <i>gpsF</i>  | General secretion pathway protein F                  | WP_007418780 | <i>Pedosphaera parvula</i>                | 38% | 1e-84    |
| L21SP4_00727 | <i>gpsG</i>  | General secretion pathway protein G                  | WP_036291839 | <i>Methylosinus</i> sp. PW1               | 48% | 7e-35    |
| L21SP4_00728 | <i>gpsH</i>  | General secretion pathway protein H                  | WP_041248570 | <i>Geobacter</i> sp. M18                  | 29% | 1e-07    |
| L21SP4_00729 | <i>gpsI</i>  | General secretion pathway protein I                  | D5MJH3       | " <i>Ca. Methyloirabilis oxyfera</i> "    | 32% | 2.3e-6   |
| L21SP4_00730 | <i>gpsJ</i>  | General secretion pathway protein J                  | WP_017357532 | <i>Stenotrophomonas maltophilia</i>       | 28% | 2e-04    |
| L21SP4_00731 | <i>gpsK</i>  | General secretion pathway protein K                  | KJU83711     | " <i>Ca. Magnetobacterium bavaricum</i> " | 32% | 4e-21    |
| L21SP4_00732 | <i>gpsL</i>  | General secretion pathway protein L                  | A0A0F6YFR7   | <i>Sandaracinus amylolyticus</i>          | 23% | 9.7e-7   |
| L21SP4_00733 | <i>gpsM</i>  | General secretion pathway protein M                  | G2E1M1       | <i>Thiorhodococcus drewsii</i>            | 24% | 1e0      |
| L21SP4_00734 | <i>gpsD</i>  | General secretion pathway protein D                  | A3YCA1       | <i>Marinomonas</i> sp. MED121             | 28% | 1.4e-67  |
| L21SP4_01644 | <i>gpsE</i>  | General secretion pathway protein E                  | WP_007416861 | <i>Pedosphaera parvula</i>                | 57% | 0.0      |
| L21SP4_01180 | <i>bamA</i>  | Outer membrane protein assembly                      | A0A0C2DQQ0   | <i>Geoalkalibacter ferrihydriticus</i>    | 31% | 2.2e-111 |

|              |                |                                                                             |              |                                                      |     |         |
|--------------|----------------|-----------------------------------------------------------------------------|--------------|------------------------------------------------------|-----|---------|
|              |                | complex, protein A                                                          |              |                                                      |     |         |
| L21SP4_00777 | <i>bamD</i>    | Outer membrane protein assembly complex, protein D                          | Q3JD66       | <i>Nitrosococcus oceani</i>                          | 29% | 1.7e-6  |
| L21SP4_02279 | <i>wcaJ</i>    | UDP-glucose:undecaprenyl-phosphate glucose-1-phosphate transferase          | WP_012498919 | <i>Chloroherpeton thalassium</i>                     | 31% | 8e-65   |
| L21SP4_00190 | <i>eps?</i>    | Glycosyl transferase family 2                                               | KKR11054     | <i>Microgenomates bacterium</i><br>GW2011_GWA2_39_19 | 30% | 7e-20   |
| L21SP4_00191 | <i>fkbM</i>    | Methyltransferase                                                           | WP_003436505 | <i>Psychroflexus gondwanensis</i>                    | 41% | 1e-77   |
| L21SP4_00192 | <i>wzx</i>     | Polysaccharide export protein                                               | WP_013258499 | <i>Desulfarculus baarsii</i>                         | 32% | 2e-37   |
| L21SP4_00193 | <i>eps?</i>    | Glycosyl transferase family 2                                               | Q116W2       | <i>Trichodesmium erythraeum</i>                      | 33% | 1.3e-32 |
| L21SP4_00194 | <i>rfaB_4</i>  | Glycosyl transferase family 1                                               | WP_012870732 | <i>Sphaerobacter thermophilus</i>                    | 35% | 1e-34   |
| L21SP4_00195 | <i>eps?</i>    | Glycosyl transferase family 2                                               | WP_026798035 | <i>Planktothrix prolifica</i>                        | 34% | 9e-28   |
| L21SP4_00196 | <i>rfaB_5</i>  | Glycosyl transferase family 1                                               | WP_051976056 | <i>Methylobacterium</i> sp. UNCCL110                 | 39% | 4e-39   |
| L21SP4_00197 | <i>eps?</i>    | Glycosyl transferase                                                        | E6U648       | <i>Ethanoligenens harbinense</i>                     | 27% | 3e-4    |
| L21SP4_00198 | <i>wcaA</i>    | Dolichol-P-glucose synthetase                                               | WP_012170747 | <i>Azorhizobium caulinodans</i>                      | 55% | 9e-136  |
| L21SP4_00199 | <i>rfaB_6</i>  | Glycosyl transferase family 1                                               | WP_006078315 | <i>Halococcus saccharolyticus</i>                    | 35% | 5e-60   |
| L21SP4_00200 | <i>wcy</i>     | O-glycosylation polymerase                                                  | A0A0B0ELS5   | “ <i>Ca. Scalindua brodae</i> ”                      | 36% | 7.5e-81 |
| L21SP4_00201 | <i>wzz/wzc</i> | Polysaccharide chain length determinant protein and protein tyrosine kinase | Q3A4J7       | <i>Pelobacter carbinolicus</i>                       | 26% | 1.2e-57 |
| L21SP4_00202 | <i>wza</i>     | Polysaccharide export protein                                               | KHE92940     | “ <i>Ca. Scalindua brodae</i> ”                      | 29% | 1e-26   |
| L21SP4_00769 | <i>acrB</i>    | Multidrug efflux pump, subunit B                                            | WP_022851495 | <i>Geovibrio</i> sp. L21-Ace-BES                     | 46% | 0.0     |
| L21SP4_00770 | <i>acrA</i>    | Multidrug efflux pump, subunit A                                            | WP_026903293 | <i>Pedobacter glucosidilyticus</i>                   | 30% | 1e-38   |
| L21SP4_00771 | <i>tolC</i>    | Outer membrane efflux protein                                               | WP_013041911 | <i>Coralimargarita akajimensis</i>                   | 30% | 2e-40   |
| L21SP4_00553 | <i>bla</i>     | Beta-lactamase                                                              | KHD08940     | “ <i>Ca. Thiomargarita nelsonii</i> ”                | 43% | 7e-67   |
| L21SP4_00571 | <i>ars?</i>    | Arsenical-resistance protein (fragment)                                     | K0NHN6       | <i>Desulfobacula toluolica</i>                       | 90% | 3.2e-21 |

|              |             |                                       |              |                                     |     |       |
|--------------|-------------|---------------------------------------|--------------|-------------------------------------|-----|-------|
| L21SP4_00572 | <i>arsC</i> | Arsenate reductase                    | WP_011341509 | <i>Pelobacter carbinolicus</i>      | 74% | 3e-72 |
| L21SP4_00573 | <i>arsB</i> | Permease                              | WP_015774086 | <i>Desulfomicrobium baculatum</i>   | 69% | 0.0   |
| L21SP4_00574 | <i>arsR</i> | Arsenical resistance operon repressor | WP_029458583 | <i>Desulfovibrio alcoholivorans</i> | 63% | 2e-33 |

### Response to environmental stress

|              |              |                                                                  |              |                                            |     |         |
|--------------|--------------|------------------------------------------------------------------|--------------|--------------------------------------------|-----|---------|
| L21SP4_00578 | <i>nqrF</i>  | Na <sup>+</sup> -translocating NADH-quinone reductase, subunit F | WP_010526036 | <i>Thermopagus xiamenensis</i>             | 58% | 0.0     |
| L21SP4_00579 | <i>nqrE</i>  | Na <sup>+</sup> -translocating NADH-quinone reductase, subunit E | WP_012175956 | <i>Desulfococcus oleovorans</i>            | 69% | 3e-93   |
| L21SP4_00580 | <i>nqrD</i>  | Na <sup>+</sup> -translocating NADH-quinone reductase, subunit D | WP_012475742 | <i>Chlorobium phaeobacteroides</i>         | 63% | 1e-78   |
| L21SP4_00581 | <i>nqrC</i>  | Na <sup>+</sup> -translocating NADH-quinone reductase, subunit C | WP_012175954 | <i>Desulfococcus oleovorans</i>            | 41% | 6e-40   |
| L21SP4_00582 | <i>nqrB</i>  | Na <sup>+</sup> -translocating NADH-quinone reductase, subunit B | WP_011112869 | <i>Nitrosomonas europaea</i>               | 52% | 2e-135  |
| L21SP4_00583 | <i>nqrA</i>  | Na <sup>+</sup> -translocating NADH-quinone reductase, subunit A | WP_012475745 | <i>Chlorobium phaeobacteroides</i>         | 39% | 5e-96   |
| L21SP4_02072 | <i>sod</i>   | Superoxide dismutase                                             | A0A0F2NB26   | <i>Desulfobulbaceae</i> bacterium BRH_c16a | 66% | 1.7e-94 |
| L21SP4_00226 | <i>rub</i>   | Rubredoxin                                                       | WP_041284942 | <i>Desulfotomaculum gibsoniae</i>          | 60% | 2e-15   |
| L21SP4_00882 | <i>rbr</i>   | Rubrerythrin                                                     | WP_012475810 | <i>Chlorobium phaeobacteroides</i>         | 70% | 7e-81   |
| L21SP4_01429 | <i>ahpC</i>  | Alkyl hydroperoxide reductase                                    | WP_012842556 | <i>Rhodothermus marinus</i>                | 47% | 2e-55   |
| L21SP4_00052 | <i>cdr_1</i> | Coenzyme A-disulfide reductase                                   | G2E3F0       | <i>Thiorhodococcus drewsii</i>             | 65% | 0.0     |
| L21SP4_02384 | <i>cdr_2</i> | Coenzyme A-disulfide reductase                                   | G2E3F0       | <i>Thiorhodococcus drewsii</i>             | 66% | 0.0     |
| L21SP4_01626 | <i>prx</i>   | Peroxiredoxin                                                    | WP_012280978 | <i>Francisella philomiragia</i>            | 65% | 4e-108  |

|              |              |                                                  |              |                                           |     |          |
|--------------|--------------|--------------------------------------------------|--------------|-------------------------------------------|-----|----------|
| L21SP4_00050 | <i>ahpD</i>  | Alkylhydroperoxidase                             | WP_011375458 | <i>Lactobacillus sakei</i>                | 54% | 1e-25    |
| L21SP4_01628 | <i>msrA</i>  | Peptide methionine sulfoxide reductase A         | WP_048114621 | <i>Methanoculleus</i> sp. MH98A           | 68% | 2e-63    |
| L21SP4_02069 | <i>gsmt</i>  | Glycine/sarcosine N-methyltransferase            | A1WXN0       | <i>Halorhodospira halophila</i>           | 70% | 1.7e-138 |
| L21SP4_02070 | <i>sdmt</i>  | Sarcosine/dimethylglycine N-methyltransferase    | D5EA51       | <i>Methanohalophilus mahii</i>            | 64% | 1.7e-127 |
| L21SP4_00520 | <i>betT</i>  | Choline/glycine betaine transporter              | WP_053186822 | <i>Sunxiuqinia dokdonensis</i>            | 62% | 0.0      |
| L21SP4_02155 | <i>opuAC</i> | Glycine betaine transporter, binding protein     | WP_006309190 | <i>Caldisaliniibacter kiritimatiensis</i> | 56% | 6e-102   |
| L21SP4_02156 | <i>opuAB</i> | Glycine betaine transporter, permease            | WP_011100478 | <i>Clostridium tetani</i>                 | 62% | 5e-118   |
| L21SP4_02157 | <i>opuCA</i> | Glycine betaine transporter, ATP-binding protein | WP_006309192 | <i>Caldisaliniibacter kiritimatiensis</i> | 59% | 9e-165   |
| L21SP4_00973 | <i>spp</i>   | Sucrose-6F-phosphate phosphohydrolase            | G4T022       | <i>Methylomicrobium alcaliphilum</i>      | 36% | 1.2e-42  |
| L21SP4_02012 | <i>sus</i>   | Sucrose synthase                                 | WP_008869127 | <i>Desulfonatronospira thiodismutans</i>  | 57% | 0.0      |
| L21SP4_02013 | <i>sps</i>   | Sucrose-phosphate synthase                       | WP_008660974 | <i>Rhodopirellula europaea</i>            | 57% | 0.0      |
| L21SP4_02014 | <i>pfkB</i>  | PfkB family carbohydrate kinase                  | WP_013034801 | <i>Nitrosococcus halophilus</i>           | 47% | 1e-84    |
| L21SP4_02131 | <i>sucP</i>  | Sucrose phosphorylase                            | U2ER30       | <i>Salinisphaera shabanensis</i>          | 51% | 0.0      |
| L21SP4_00167 | <i>nhx_1</i> | Na <sup>+</sup> /H <sup>+</sup> exchanger        | WP_045088202 | <i>Defluviitoga tunisiensis</i>           | 37% | 2e-68    |
| L21SP4_00232 | <i>nhx_2</i> | Na <sup>+</sup> /H <sup>+</sup> exchanger        | F2JJN3       | <i>Cellulosilyticum lentocellum</i>       | 36% | 1.5e-78  |
| L21SP4_00348 | <i>nhx_3</i> | Na <sup>+</sup> /H <sup>+</sup> exchanger        | WP_020611771 | <i>Spirochaeta bajacaliforniensis</i>     | 52% | 7e-171   |
| L21SP4_02045 | <i>nhx_4</i> | Na <sup>+</sup> /H <sup>+</sup> exchanger        | WP_040847527 | <i>Treponema lecithinolyticum</i>         | 36% | 8e-99    |

### Central metabolic pathways and regulation

|              |             |                              |            |                                 |     |          |
|--------------|-------------|------------------------------|------------|---------------------------------|-----|----------|
| L21SP4_02170 | <i>rhaM</i> | L-rhamnose mutarotase        | A0A081C0V9 | Bacterium UASB270               | 70% | 87e-48   |
| L21SP4_00462 | <i>rhaA</i> | L-rhamnose isomerase         | B1ZR99     | <i>Opitutus terrae</i>          | 59% | 0.0      |
| L21SP4_01498 | <i>rhaB</i> | Rhamnulokinase               | I0I7M4     | <i>Caldilinea aerophila</i>     | 49% | 2.7e-162 |
| L21SP4_01948 | <i>rhaD</i> | Rhamnose utilisation protein | F5Y7S7     | <i>Treponema azotonutricium</i> | 37% | 8.6e-66  |

|              |               |                                                                   |              |                                       |     |          |
|--------------|---------------|-------------------------------------------------------------------|--------------|---------------------------------------|-----|----------|
| L21SP4_02182 | <i>glk</i>    | ROK family Glucokinase                                            | B8CYI5       | <i>Halothermothrix orenii</i>         | 36% | 1.1e-59  |
| L21SP4_00854 | <i>pgi</i>    | Glucose-6-phosphate isomerase                                     | WP_014435059 | <i>Caldilinea aerophila</i>           | 62% | 0.0      |
| L21SP4_01271 | <i>pfkA</i>   | 6-Phosphofructokinase                                             | WP_041068814 | <i>Thiolapillus brandeum</i>          | 67% | 4e-172   |
| L21SP4_01747 | <i>pfp</i>    | Pyrophosphate--fructose 6-phosphate 1-phosphotransferase          | B8GUU2       | <i>Thioalkalivibrio sulfidiphilus</i> | 62% | 5.4e-165 |
| L21SP4_00013 | <i>fba</i>    | Fructose-bisphosphate aldolase                                    | WP_043582427 | <i>Diplosphaera colitermitum</i>      | 71% | 1e-165   |
| L21SP4_00391 | <i>tpi</i>    | Triosephosphate isomerase                                         | CDE04447     | <i>Anaerotruncus</i> sp. CAG:390      | 69% | 1e-111   |
| L21SP4_00485 | <i>gap</i>    | Glyceraldehyde-3-phosphate dehydrogenase                          | WP_006930994 | <i>Caldithrix abyssi</i>              | 61% | 2e-149   |
| L21SP4_00558 | <i>pgk</i>    | Phosphoglycerate kinase                                           | WP_014560136 | <i>Ignavibacterium album</i>          | 59% | 1e-166   |
| L21SP4_01985 | <i>gpmA</i>   | 2,3-Bisphosphoglycerate-dependent phosphoglycerate mutase         | WP_012500693 | <i>Chloroherpeton thalassium</i>      | 73% | 1e-128   |
| L21SP4_02068 | <i>eno</i>    | Enolase                                                           | WP_016779037 | <i>Anaerophaga thermohalophila</i>    | 77% | 0.0      |
| L21SP4_01945 | <i>ppdK</i>   | Pyruvate phosphate dikinase                                       | WP_006929451 | <i>Caldithrix abyssi</i>              | 73% | 0.0      |
| L21SP4_01695 | <i>adk</i>    | Adenylate kinase                                                  | A8UWY7       | <i>Hydrogenivirga</i> sp. 128-5-R1-1  | 52% | 2.7e-72  |
| L21SP4_01431 | <i>phdE</i>   | Pyruvate dehydrogenase complex, E1 component                      | B5YC76       | <i>Dictyoglomus thermophilum</i>      | 48% | 0.0      |
| L21SP4_01432 | <i>phdC_1</i> | Pyruvate dehydrogenase complex, E2 component (N-terminal subunit) | U3A8N8       | <i>Novosphingobium tardaugens</i>     | 49% | 3.6e-26  |
| L21SP4_01433 | <i>phdC_2</i> | Pyruvate dehydrogenase complex, E2 component (C-terminal subunit) | A0A023X0M2   | <i>Rubrobacter radiotolerans</i>      | 47% | 1.1e-54  |
| L21SP4_01434 | <i>phdD</i>   | Pyruvate dehydrogenase complex, E3 component                      | WP_049954889 | <i>Halostagnicola larsenii</i>        | 44% | 5e-115   |
| L21SP4_00338 | <i>por</i>    | Pyruvate:ferredoxin (flavodoxin) oxidoreductase                   | WP_006928237 | <i>Caldithrix abyss</i>               | 66% | 0.0      |

|              |               |                                                     |              |                                       |     |          |
|--------------|---------------|-----------------------------------------------------|--------------|---------------------------------------|-----|----------|
| L21SP4_00414 | <i>pflA</i>   | Pyruvate:formate lyase activating enzyme            | WP_034844058 | <i>Clostridium cellulosi</i>          | 45% | 1e-90    |
| L21SP4_00415 | <i>pfl</i>    | Pyruvate:formate lyase                              | WP_004623430 | <i>Clostridium termitidis</i>         | 39% | 2e-179   |
| L21SP4_02432 | <i>fhs</i>    | Formate--tetrahydrofolate ligase                    | WP_013163071 | <i>Desulfurivibrio alkaliphilus</i>   | 67% | 0.0      |
| L21SP4_02150 | <i>ldhA</i>   | Lactate dehydrogenase                               | WP_013313365 | <i>Spirochaeta thermophila</i>        | 63% | 9e-151   |
| L21SP4_01445 | <i>ackA</i>   | Acetate kinase                                      | WP_014163260 | <i>Thermovirga lienii</i>             | 56% | 3e-153   |
| L21SP4_01446 | <i>pta</i>    | Phosphate acetyltransferase                         | CDD36874     | <i>Clostridium</i> sp. CAG:356        | 52% | 4e-106   |
| L21SP4_02481 | <i>adhE</i>   | Bifunctional acetaldehyde-CoA/alcohol dehydrogenase | WP_024123985 | <i>Thermosynechococcus</i> sp. NK55a  | 69% | 0.0      |
| L21SP4_01302 | <i>hydA_1</i> | Fe-only hydrogenase, subunit A                      | F6CNN4       | <i>Desulfotomaculum kuznetsovii</i>   | 73% | 0.0      |
| L21SP4_01303 | <i>hydB_1</i> | Fe-only hydrogenase, subunit B                      | A0A098QYC2   | <i>Spirochaeta</i> sp. JC230          | 61% | 0.0      |
| L21SP4_01304 | <i>hydC_1</i> | Fe-only hydrogenase, subunit C                      | F0YTD3       | <i>Clostridium</i> sp. D5             | 55% | 6.3e-56  |
| L21SP4_01306 | <i>hydC_2</i> | Fe-only hydrogenase, subunit C                      | I6YYQ7       | <i>Melioribacter roseus</i>           | 55% | 1.3e-53  |
| L21SP4_01307 | <i>hydB_2</i> | Fe-only hydrogenase, subunit B                      | I6YYQ7       | <i>Melioribacter roseus</i>           | 61% | 5.5e-168 |
| L21SP4_01308 | <i>hydA_2</i> | Fe-only hydrogenase, subunit A                      | I0AG62       | <i>Ignavibacterium album</i>          | 71% | 0.0      |
| L21SP4_01165 | <i>rnfC</i>   | RNF electron transport complex, subunit C           | S7TC88       | <i>Desulfococcus multivorans</i>      | 56% | 6.7e-176 |
| L21SP4_01166 | <i>rnfD</i>   | RNF electron transport complex, subunit D           | C0QFQ5       | <i>Desulfobacterium autotrophicum</i> | 61% | 1.7e-127 |
| L21SP4_01167 | <i>rnfG</i>   | RNF electron transport complex, subunit G           | A8ZSV4       | <i>Desulfococcus oleovorans</i>       | 50% | 3.7e-45  |
| L21SP4_01168 | <i>rnfE</i>   | RNF electron transport complex, subunit E           | C0QFQ7       | <i>Desulfobacterium autotrophicum</i> | 72% | 4.9e-97  |
| L21SP4_01169 | <i>rnfA</i>   | RNF electron transport complex, subunit A           | C0QFQ8       | <i>Desulfobacterium autotrophicum</i> | 65% | 1e-109   |
| L21SP4_01170 | <i>rnfB</i>   | RNF electron transport complex, subunit B           | KJS30282     | <i>Desulfatitalea</i> sp. BRH_c12     | 58% | 8e-121   |
| L21SP4_01276 | <i>ntpK</i>   | V-type ATP synthase, subunit K                      | WP_051564474 | <i>Desulfovermiculus halophilus</i>   | 74% | 7e-62    |
| L21SP4_01277 | <i>ntpI</i>   | V-type ATP synthase, subunit I                      | C8X3W7       | <i>Desulfohalobium retbaense</i>      | 41% | 2.2e-147 |
| L21SP4_01278 | <i>ntpD</i>   | V-type ATP synthase, subunit D                      | S7TG39       | <i>Desulfovibrio alkalitolerans</i>   | 66% | 5.2e-82  |
| L21SP4_01279 | <i>ntpB</i>   | V-type ATP synthase, subunit B                      | EPR36183     | <i>Desulfovibrio alkalitolerans</i>   | 76% | 0.0      |
| L21SP4_01280 | <i>ntpA</i>   | V-type ATP synthase, subunit A                      | S7UQ59       | <i>Desulfovibrio alkalitolerans</i>   | 70% | 0.0      |



|              |                  |                                                     |              |                                     |     |         |
|--------------|------------------|-----------------------------------------------------|--------------|-------------------------------------|-----|---------|
|              |                  | terminal domain)                                    |              |                                     |     |         |
| L21SP4_02098 | <i>mvaS</i>      | Hydroxymethylglutaryl-CoA synthase                  | WP_028471426 | <i>Neptunomonas japonica</i>        | 55% | 5e-153  |
| L21SP4_02099 | <i>idi</i>       | Isopentenyl-diphosphate delta isomerase<br>(type 2) | WP_027852820 | <i>Marinobacterium litorale</i>     | 56% | 7e-115  |
| L21SP4_00792 | <i>hprK</i>      | HPr (ser) kinase/phosphatase                        | D5EIM8       | <i>Coralimargarita akajimensis</i>  | 46% | 6.1e-84 |
| L21SP4_00793 | <i>ptsH_1</i>    | Phosphocarrier protein HPr                          | D5HAE7       | <i>Salinibacter ruber</i>           | 49% | 1.9e-21 |
| L21SP4_00794 | <i>ptsA_1</i>    | Phosphoenolpyruvate-protein<br>phosphotransferase   | WP_007413672 | <i>Pedosphaera parvula</i>          | 51% | 0.0     |
| L21SP4_00014 | <i>ptsH_2</i>    | Phosphocarrier protein HPr                          | WP_007278638 | <i>Lentisphaera araneosa</i>        | 48% | 1e-20   |
| L21SP4_01117 | <i>ptsA_2</i>    | Phosphoenolpyruvate-protein<br>phosphotransferase   | WP_014455518 | <i>Spirochaeta africana</i>         | 46% | 0.0     |
| L21SP4_00166 | <i>ptsN_1</i>    | PTS system sugar transporter, subunit IIA           | WP_025321887 | <i>Deferrisoma camini</i>           | 42% | 4e-24   |
| L21SP4_00231 | <i>ptsN_2</i>    | PTS system sugar transporter, subunit IIA           | Q2S4A8       | <i>Salinibacter ruber</i>           | 30% | 1.1e-14 |
| L21SP4_00347 | <i>ptsN_3</i>    | PTS system sugar transporter, subunit IIA           | C8PPN3       | <i>Treponema vincentii</i>          | 53% | 1.4e-44 |
| L21SP4_01384 | <i>ptsN_4</i>    | PTS system sugar transporter, subunit IIA           | WP_041589264 | <i>Thermoanaerobacter wiegelii</i>  | 28% | 6e-14   |
| L21SP4_01661 | <i>potE/ptsN</i> | Amino acid transporter/PTS IIA domain               | S7TGJ5       | <i>Desulfovibrio alkalitolerans</i> | 49% | 0.0     |
| L21SP4_02044 | <i>ptsN_5</i>    | PTS system sugar transporter, subunit IIA           | WP_009106564 | <i>Treponema</i> sp. JC4            | 45% | 1e-65   |
| L21SP4_01616 | <i>acyC</i>      | Adenylate cyclase with Chase sensor                 | WP_014260764 | <i>Desulfovibrio africanus</i>      | 33% | 1e-92   |
