# Supplementary material for: Characterization of the first cultured representative of Verrucomicrobia subdivision 5 indicates the proposal of a novel phylum
Source: PubMed Central journal article supplement — ISME J. 2016 Jun 14;10(12):2801–16. doi: 10.1038/ismej.2016.84 (PMC5148204; doi:10.1038/ismej.2016.84), 2016-06-14
Supplement: ismej201684x4.pdf [file ismej201684x4.pdf]

**Supplementary Table S3.** Classification, number and predicted activities of glycoside hydrolase genes identified in the L21-Fru-AB<sup>T</sup> genome by the CAZy database

(<http://www.cazy.org>).

| <i>Glycoside hydrolase family</i> | <i>No. of genes</i> | <i>Predicted activities</i> <sup>a</sup>                                                                           |
|-----------------------------------|---------------------|--------------------------------------------------------------------------------------------------------------------|
| GH2                               | 3                   | β-galactosidase, β-mannosidase                                                                                     |
| GH3                               | 1                   | β-glucosidase                                                                                                      |
| GH5                               | 3                   | endoglycoceramidase                                                                                                |
| GH9                               | 1                   | endoglucanase                                                                                                      |
| GH13                              | 5                   | α-amylase, amylo-α-1,6-glucosidase, 1,4-α-glucan branching, sucrose phosphorylase, trehalose-6-phosphate hydrolase |
| GH20                              | 1                   | β-hexosaminidase                                                                                                   |
| GH31                              | 1                   | α-xylosidase                                                                                                       |
| GH32                              | 4                   | sucrose-6-phosphate hydrolase                                                                                      |
| GH33                              | 1                   | neuraminidase                                                                                                      |
| GH38                              | 1                   | α-mannosidase                                                                                                      |
| GH39                              | 5                   | β-xylosidase                                                                                                       |
| GH43                              | 1                   | β-xylosidase                                                                                                       |
| GH44                              | 1                   | endoglucanase                                                                                                      |
| GH65                              | 3                   | trehalose phosphorylase, kojibiose phosphorylase                                                                   |
| GH78                              | 12                  | α-L-rhamnosidase                                                                                                   |
| GH89                              | 1                   | α-N-acetylglucosaminidase                                                                                          |
| GH95                              | 1                   | α-L-fucosidase                                                                                                     |
| GH97                              | 1                   | α-glucosidase                                                                                                      |
| GH105                             | 1                   | unsaturated β-glucuronyl hydrolase                                                                                 |
| GH106                             | 6                   | α-L-rhamnosidase                                                                                                   |
| GH110                             | 1                   | α-galactosidase                                                                                                    |
| GH115                             | 1                   | α-glucuronidase                                                                                                    |
| GH127                             | 2                   | β-L-arabinofuranosidase                                                                                            |
| GH130                             | 1                   | phosphorylase                                                                                                      |
| GH133                             | 1                   | amylo-α-1,6-glucosidase                                                                                            |
| GHnc <sup>b</sup>                 | 7                   | unknown                                                                                                            |

<sup>a</sup> The predicted activities of enzymes encoded by genes affiliated to distinct glycoside hydrolase families were either based on the annotation of the L21-Fru-AB<sup>T</sup> genome sequence or were general predictions taken from the CAZy database (<http://www.cazy.org/Glycoside-Hydrolases.html>), if no annotation based on protein similarity was possible.

<sup>b</sup> Non-classified glycoside hydrolase genes not yet assigned to a family.
